# Supplementary material for: UV-shielding transparent PMMA/In2O3 nanocomposite films based on In2O3 nanoparticles
Source: Royal Society of Chemistry journal article supplement (doi:10.1039/c3ra42244e), 2013-01-01
Supplement: c3ra42244e.pdf [file c3ra42244e.pdf]

## UV-shielding Transparent PMMA-In<sub>2</sub>O<sub>3</sub> Nanocomposite Films based on In<sub>2</sub>O<sub>3</sub> Nanoparticles

Anshu Singhal,<sup>\*a</sup> K.A. Dubey,<sup>b</sup> Y.K. Bhardwaj,<sup>b</sup> D. Jain,<sup>a</sup> Sipra Choudhury and A.K. Tyagi<sup>a</sup>

<sup>a</sup>Chemistry Division, <sup>b</sup>Radiation Technology Development Division, Bhabha Atomic Research Centre, Trombay, Mumbai- 400 085. India.

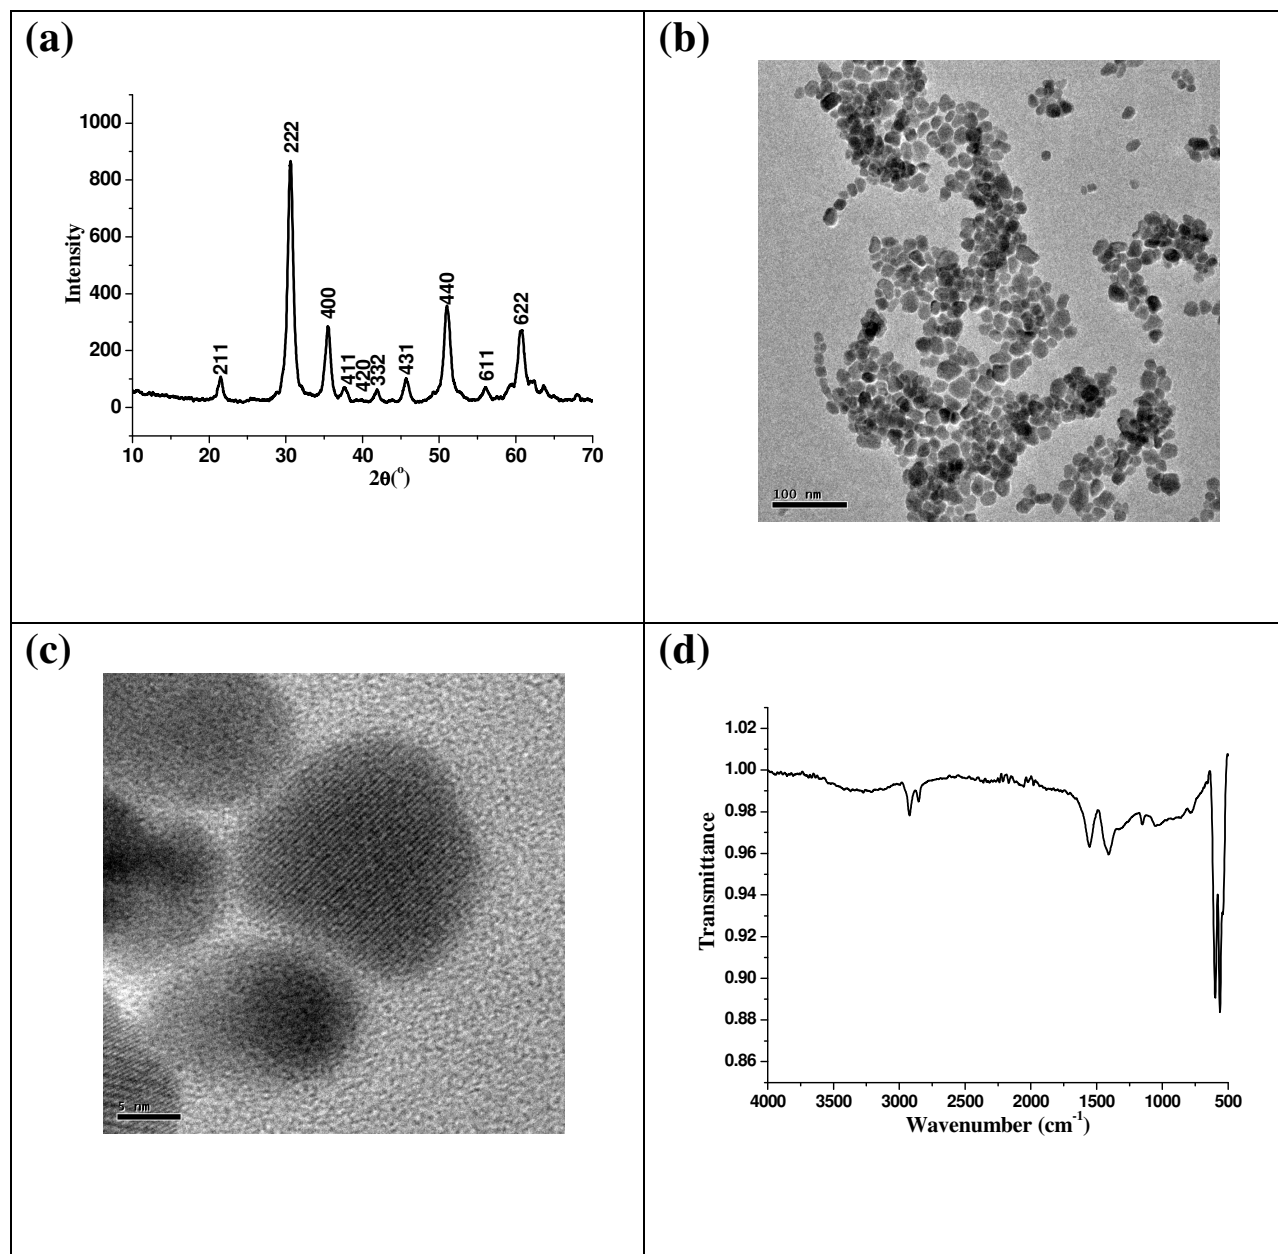

Fig. S1 (a) XRD pattern of In<sub>2</sub>O<sub>3</sub> nanoparticles (b) low-resolution TEM image of In<sub>2</sub>O<sub>3</sub> nanoparticles (c) HRTEM image of In<sub>2</sub>O<sub>3</sub> nanoparticles. The bar size is 5 nm. (d) FTIR spectrum for In<sub>2</sub>O<sub>3</sub> nanoparticles.

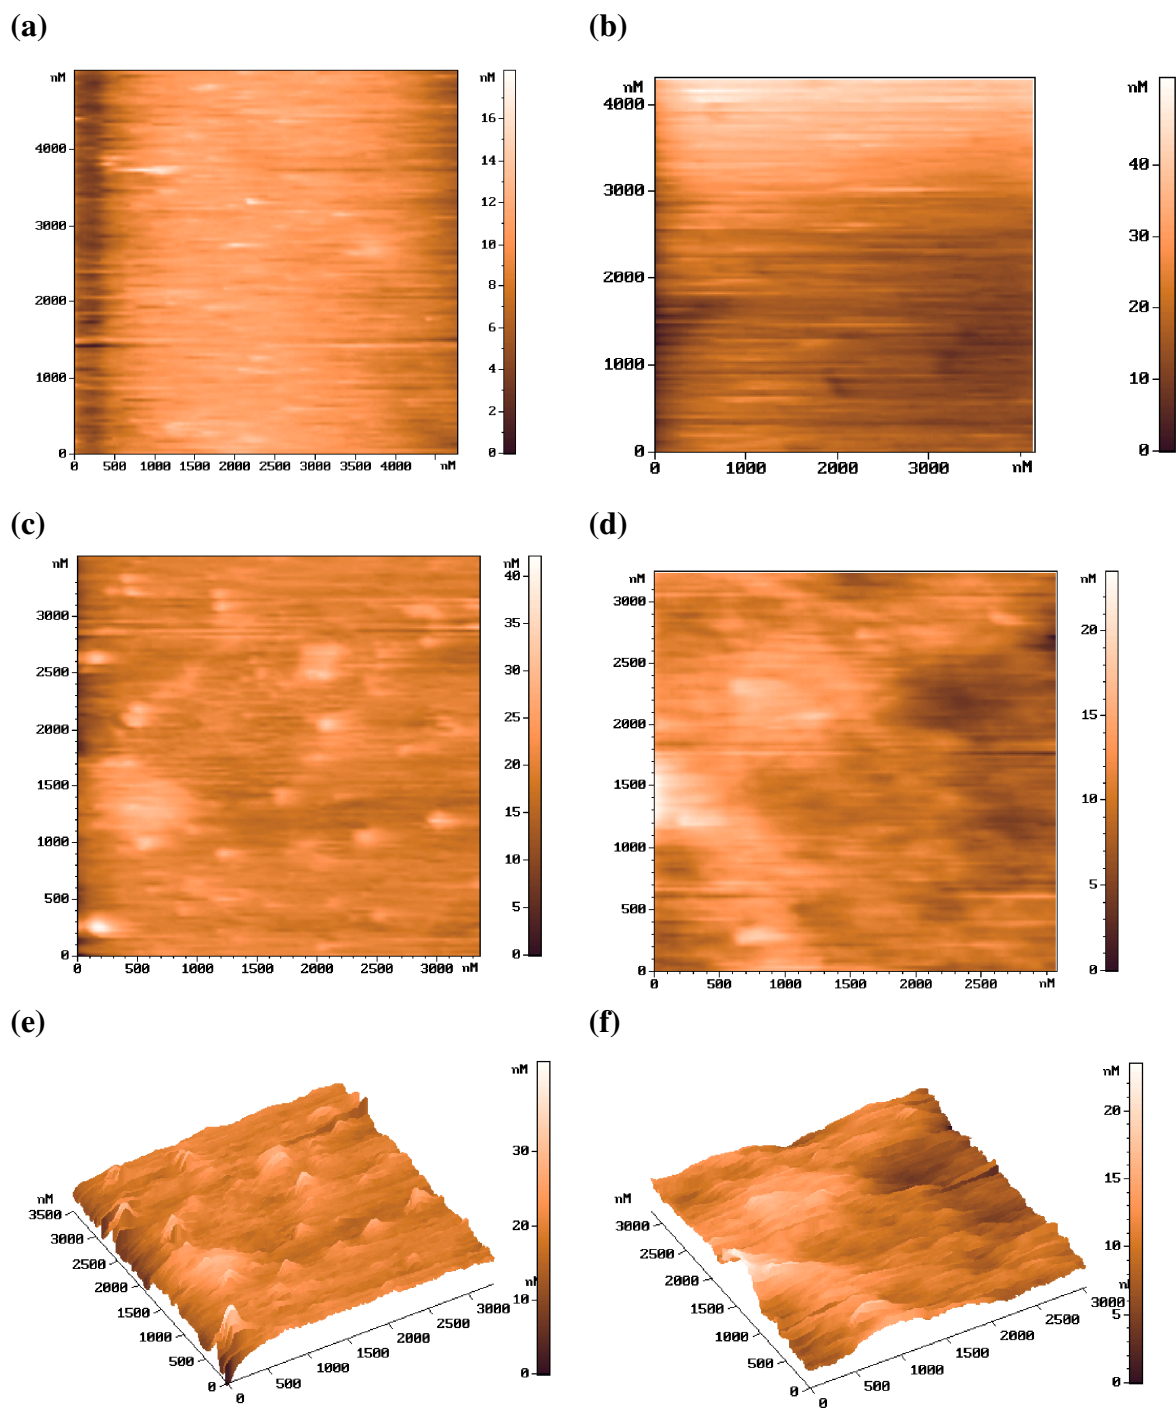

Fig. S2 AFM images of (a) solvent cast pristine PMMA film (b) spin cast pristine PMMA film (c) solvent cast PMMA-IO1 nanocomposite film (d) spin cast PMMA-IO1 nanocomposite film. 3D AFM images for (e) solvent cast PMMA-IO1 (f) and spin cast PMMA-IO1 nanocomposite films are also given.
